# Supplementary material
Source: Springer Nature journal article supplement (https://www.springermedizin.de/resource/supplementary/12883_2010_442_MOESM1_ESM.pdf/9455454)

### Men

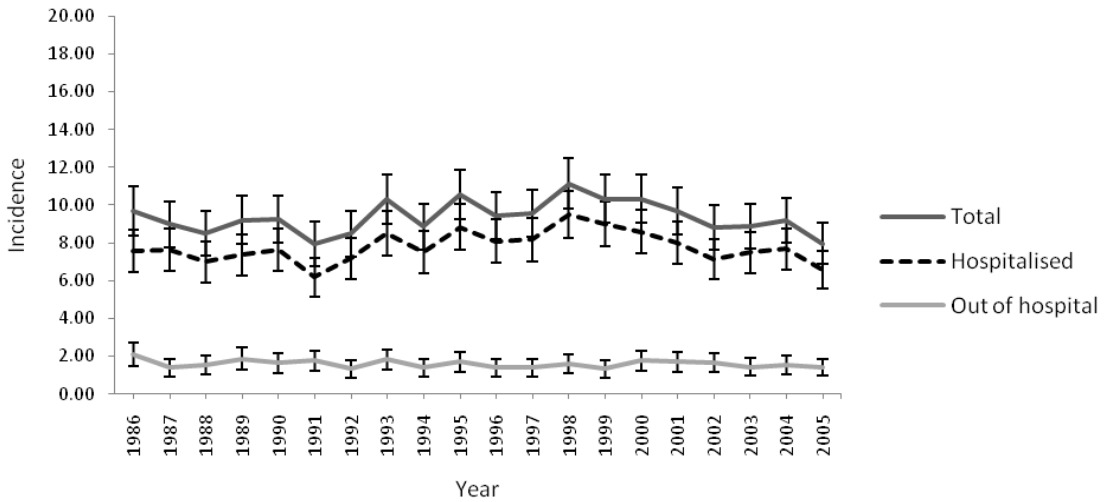

### Women

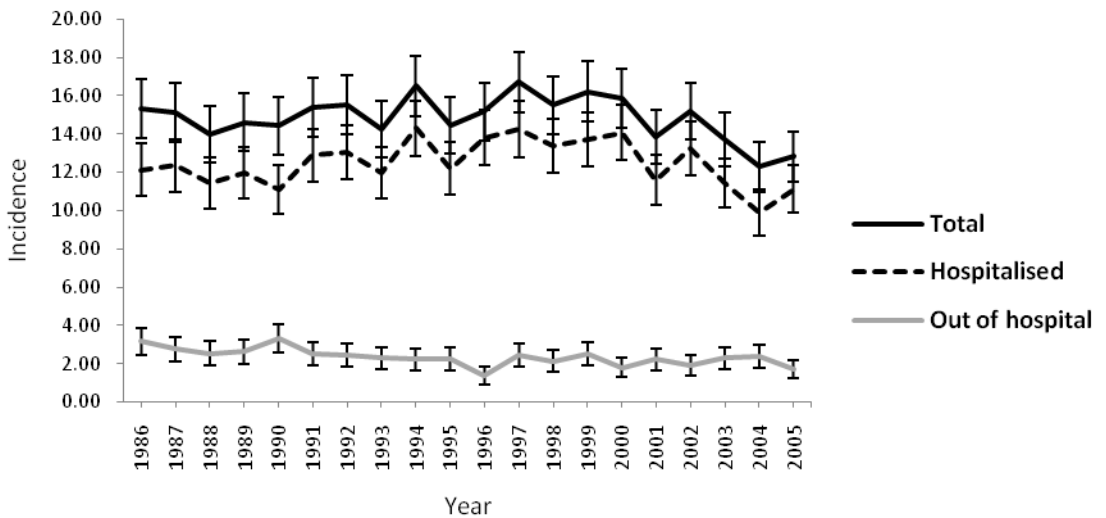

Supplement: MOESM1 [file 9455454]
